# Supplementary material for: Risk Scoring System of Mortality and Prediction Model of Hospital Stay for Critically Ill Patients Receiving Parenteral Nutrition
Source: MDPI journal article supplement (doi:10.3390/healthcare9070853), 2021-07-06
Supplement: s1 [file s1]

**Table S1.** Composition of 2-in-1 or 3-in-1 parenteral nutrition admixtures used in this study.

| Chamber type               | 2-in-1                    |                               | 3-in-1                        |                                                                |                           |                           |
|----------------------------|---------------------------|-------------------------------|-------------------------------|----------------------------------------------------------------|---------------------------|---------------------------|
|                            | Combiflex <sup>®</sup>    | Olimel <sup>®</sup>           | Winuf <sup>®</sup>            |                                                                |                           |                           |
| Product                    | 1,100 mL (for peripheral) | N9E 1,000 mL (for central)    | N4E 1,500 mL (for peripheral) | 1,435 mL (for central)                                         | 1,085 mL (for peripheral) | 2,020 mL (for peripheral) |
| Glucose (g)                | 120                       | 110 <sup>a</sup>              | 113 <sup>a</sup>              | 200 <sup>b</sup>                                               | 84 <sup>b</sup>           | 157 <sup>b</sup>          |
| Glucose (kcal)             | 480                       | 440                           | 450                           | 728                                                            | 307                       | 572                       |
| Amino acids (g)            | 20.7                      | 57                            | 38                            | 73                                                             | 34                        | 64                        |
| Nitrogen, N (g)            | 3.4                       | 9                             | 6                             | 11.7                                                           | 5.5                       | 10.2                      |
| Amino acids (kcal)         | 83                        | 230                           | 150                           | 292                                                            | 137                       | 254                       |
| Lipid (g)                  | 0                         | 40                            | 45                            | 55                                                             | 31                        | 57                        |
| Lipid (kcal)               | 0                         | 400                           | 450                           | 546                                                            | 306                       | 570                       |
| Lipid content ratio (%w/w) | N/A                       | Olive oil/Soybean oil = 80/20 |                               | Fish oil/Olive oil/MCT <sup>c</sup> /Soybean Oil = 20/25/25/30 |                           |                           |
| Total energy (kcal)        | 563                       | 1070                          | 1050                          | 1,600                                                          | 750                       | 1400                      |
| NPC                        | 480                       | 840                           | 900                           | 1,300                                                          | 615                       | 1145                      |
| NPC/N (kcal/g)             | 140                       | 93                            | 150                           | 111                                                            | 112                       | 112                       |

MCT: middle chain triglycerides derived from coconut oil; N/A: not available; NPC: non-protein calorie. <sup>a</sup>Anhydrous, <sup>b</sup>Monohydrate.

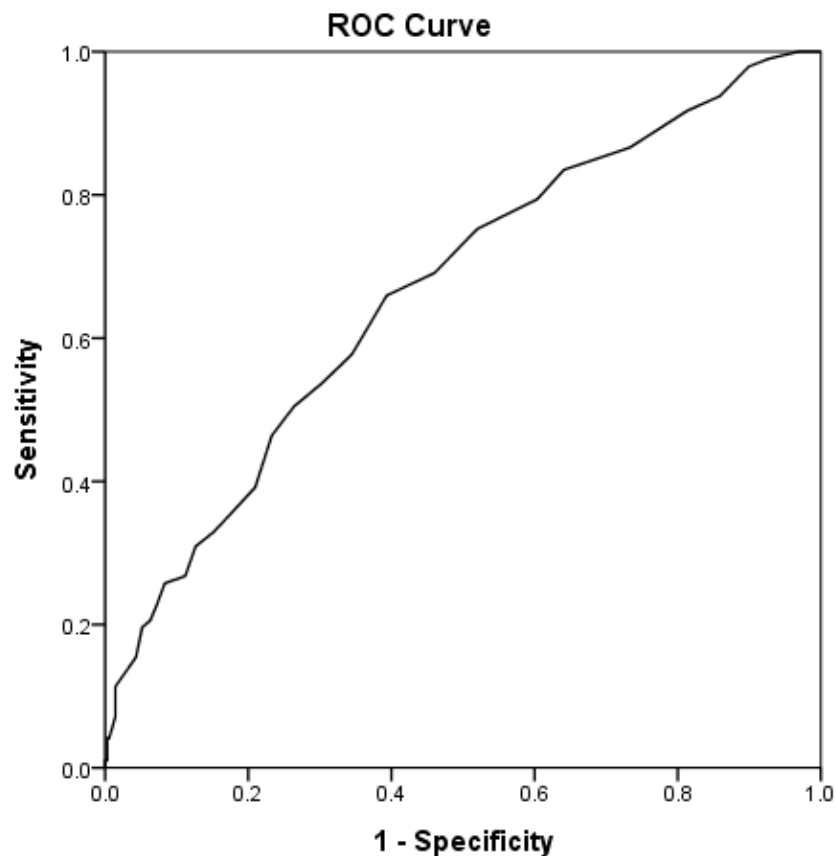

Diagonal segments are produced by ties.

**Figure S1.** Area under the curve for (-) albumin level.
